# Supplementary material
Source: PubMed Central journal article supplement (PMC7959982)
Supplement: 16-00118.pdf [file 16-00118.pdf]

**On-line Table: Characteristics of the study population by quartiles of walking speed**

| Characteristics (No.)                                   | Entire Group<br>(n = 230) | WSP Quartile 1<br>(Slowest) (n = 58) | WSP Quartile 2<br>(n = 72) | WSP Quartile 3<br>(n = 50) | WSP Quartile 4<br>(Fastest) (n = 50) | P<br>Value         |
|---------------------------------------------------------|---------------------------|--------------------------------------|----------------------------|----------------------------|--------------------------------------|--------------------|
| Walking speed with 3 turns (mean) (SD) (range) (m/s)    | 0.40 (0.10) (0.16–0.80)   | 0.31 (0.33) (0.16–0.33)              | 0.39 (0.19) (0.35–0.40)    | 0.44 (0.17) (0.42–0.47)    | 0.53 (0.51) (0.50–0.80)              | .001 <sup>ab</sup> |
| Age (mean) (SD) (yr)                                    | 70.2 (4.9)                | 71.8 (5.0)                           | 70.1 (4.7)                 | 68.8 (4.7)                 | 69.7 (4.7)                           | .013 <sup>ab</sup> |
| Female (No.) (%)                                        | 153 (66.5)                | 44 (75.9)                            | 41 (56.9)                  | 34 (68.0)                  | 34 (68.0)                            | .149 <sup>c</sup>  |
| Height (mean) (SD) (cm)                                 | 164.3 (8.3)               | 161.4 (8.0)                          | 166.0 (8.7)                | 165.0 (7.3)                | 164.6 (8.5)                          | .015 <sup>ab</sup> |
| Hypertension (No.) (%)                                  | 165 (71.7)                | 47 (81.0)                            | 46 (63.9)                  | 37 (74.0)                  | 35 (70.0)                            | .182 <sup>c</sup>  |
| Diabetes (No.) (%)                                      | 30 (13.0)                 | 17 (29.3)                            | 8 (11.1)                   | 2 (4.0)                    | 3 (6.0)                              | .001 <sup>ac</sup> |
| Hypercholesterolemia (No.) (%)                          | 189 (82.2)                | 47 (81.0)                            | 58 (80.6)                  | 44 (88.0)                  | 40 (80.0)                            | .682 <sup>c</sup>  |
| Hypertriglyceridemia (No.) (%)                          | 40 (17.4)                 | 14 (24.1)                            | 14 (19.4)                  | 7 (14.0)                   | 5 (10.0)                             | .226 <sup>b</sup>  |
| Hyperuricemia (No.) (%)                                 | 69 (30)                   | 15 (25.9)                            | 30 (41.7)                  | 15 (30.0)                  | 9 (18.0)                             | .036 <sup>ac</sup> |
| Cardiac disease (No.) (%)                               | 64 (27.8)                 | 14 (24.1)                            | 16 (22.2)                  | 16 (32.0)                  | 18 (36.0)                            | .306 <sup>c</sup>  |
| Peripheral vascular disease (No.) (%)                   | 1 (0.4)                   | 0 (0.0)                              | 1 (1.4)                    | 0 (0.0)                    | 0 (0.0)                              | .531 <sup>c</sup>  |
| Venous embolic disease (No.) (%)                        | 33 (14.3)                 | 10 (17.2)                            | 7 (9.7)                    | 12 (24.0)                  | 4 (8.0)                              | .069 <sup>c</sup>  |
| Normalized brain volume (mean) (SD) (cm <sup>3</sup> )  | 990.3 (97.4)              | 974.0 (95.8)                         | 1000.0 (100.4)             | 985.9 (87.3)               | 999.7 (104.2)                        | .411 <sup>b</sup>  |
| Normalized WMH volume (median) (IQR) (cm <sup>3</sup> ) | 13.3 (7.0; 25.8)          | 11.7 (3.6; 32.6)                     | 12.7 (7.0; 29.2)           | 14.7 (8.2; 23.8)           | 14.4 (8.1; 22.5)                     | .663 <sup>c</sup>  |
| Lacunes (No.) (%)                                       | 32 (13.9)                 | 10 (17.2)                            | 11 (15.3)                  | 6 (12.0)                   | 5 (10.0)                             | .696 <sup>c</sup>  |
| Silent, noninfarcts (No.) (%)                           | 13 (5.7)                  | 5 (8.6)                              | 4 (5.6)                    | 2 (4.0)                    | 2 (4.0)                              | .689 <sup>c</sup>  |
| Microbleeds (No.) (%)                                   | 24 (10.4)                 | 9 (15.5)                             | 10 (13.9)                  | 5 (10.0)                   | 0 (0.0)                              | .039 <sup>ab</sup> |
| Memory (z-value) (SD)                                   | -0.19 (0.84)              | -0.33 (0.71)                         | -0.28 (0.94)               | -0.031 (0.87)              | -0.033 (0.75)                        | .112 <sup>b</sup>  |
| Executive function (z-value) (SD)                       | -0.11 (0.55)              | -0.26 (0.64)                         | -0.21 (0.56)               | -0.05 (0.47)               | 0.17 (0.37)                          | <.001 <sup>a</sup> |
| SPPB (mean) (SD)                                        | 7.1 (2.0)                 | 6.0 (2.3)                            | 7.1 (1.0)                  | 7.2 (1.3)                  | 8.4 (2.1)                            | <.001 <sup>a</sup> |

**Note:**—WSP indicates walking speed; IQR, interquartile range.

<sup>a</sup> Statistically significant (P < .05)

<sup>b</sup> Analysis of variance.

<sup>c</sup>  $\chi^2$  test.
